# Supplementary material for: Pro-Inflammatory Signature in Decidua of Recurrent Pregnancy Loss Regardless of Embryonic Chromosomal Abnormalities
Source: Frontiers journal article supplement (doi:10.3389/fimmu.2021.772729), 2021-12-08
Supplement: Data_Sheet_1.PDF [file Data_Sheet_1.PDF]

## Supplemental Materials

**Table S1.** list of markers used in the present CyTOF panel including their label,clone,source,cat,dilution and staining information.

| List | Label | Marker | clone    | Source      | Cat          | Dilution | Staining      |
|------|-------|--------|----------|-------------|--------------|----------|---------------|
| 1    | 89Y   | CD45   | HI30     | BioLegend   | 304002       | 100      | Surface       |
| 2    | 115In | CD3    | UCHT1    | BioXcell    | BE0231       | 200      | Surface       |
| 3    | 139La | CD68   | Y1/82A   | BioLegend   | 333802       | 100      | Intracellular |
| 4    | 141Pr | CD56   | NCAM16.2 | BD          | 559043       | 800      | Surface       |
| 5    | 142Nd | CD13   | WM15     | Biolegend   | 301702       | 50       | Surface       |
| 6    | 143Nd | CXCR4  | 12G5     | Biolegend   | 306502       | 100      | Surface       |
| 7    | 144Nd | CD38   | HIT2     | BioLegend   | 303502       | 100      | Surface       |
| 8    | 145Nd | CD81   | 5A6      | BioLegend   | 349502       | 50       | Surface       |
| 9    | 146Nd | CD54   | HA58     | BioLegend   | 353102       | 100      | Surface       |
| 10   | 147Sm | CD85j  | GHI/75   | BioLegend   | CD85j        | 200      | Surface       |
| 11   | 148Nd | CD19   | HIB19    | BioLegend   | 333802       | 200      | Surface       |
| 12   | 149Sm | CD25   | 24212    | RD          | MAB1020      | 400      | Surface       |
| 13   | 150Nd | CD73   | AD2      | BioLegend   | 344002       | 100      | Surface       |
| 14   | 151Eu | CD172a | SE5A5    | BioLegend   | 323802       | 200      | Surface       |
| 15   | 152Sm | CCR5   | J418F1   | BioLegend   | 350002       | 400      | Surface       |
| 16   | 153Eu | CD161  | HP-3G10  | BioLegend   | 339902       | 100      | Surface       |
| 17   | 154Sm | CD163  | GHI/61   | RD          | MAB16072-100 | 100      | Surface       |
| 18   | 155Gd | CD39   | A1       | BioLegend   | 328202       | 100      | Surface       |
| 19   | 156Gd | CD200R | OX-108   | BioLegend   | 329302       | 100      | Surface       |
| 20   | 157Gd | CD71   | GY1G4    | BioLegend   | 334102       | 100      | Surface       |
| 21   | 158Gd | CD11c  | BU15     | BioLegend   | 337202       | 400      | Surface       |
| 22   | 159Tb | CD16   | 3G8      | BioLegend   | 302014       | 100      | Surface       |
| 23   | 160Gd | CD14   | M5E2     | BioLegend   | 301810       | 50       | Surface       |
| 24   | 161Dy | CD64   | 10.1     | BioLegend   | 305002       | 50       | Surface       |
| 25   | 162Dy | Foxp3  | PCH101   | eBioscience | 14-4776-82   | 50       | Intracellular |
| 26   | 163Dy | CCR1   | 5F10b29  | BioLegend   | 362902       | 50       | Surface       |
| 27   | 164Dy | CCR2   | K036C2   | BioLegend   | 357202       | 100      | Surface       |
| 28   | 165Ho | CD105  | 43A3     | BioLegend   | 323214       | 100      | Surface       |
| 29   | 166Er | CD32   | FUN-2    | BioLegend   | 303202       | 200      | Surface       |
| 30   | 167Er | CD206  | '15-2    | BioLegend   | 321127       | 100      | Surface       |
| 31   | 168Er | Tbet   | 4B10     | BioLegend   | 644825       | 100      | Intracellular |

|    |       |        |         |             |            |     |               |
|----|-------|--------|---------|-------------|------------|-----|---------------|
| 32 | 169Tm | CD36   | 5-271   | BioLegend   | 336202     | 400 | Surface       |
| 33 | 170Er | CD127  | A019D5  | BioLegend   | 351302     | 100 | Surface       |
| 34 | 171Yb | GATA3  | TWAJ    | eBioscience | 14-9966-82 | 50  | Intracellular |
| 35 | 172Yb | CD304  | 12C2    | BioLegend   | 354502     | 100 | Surface       |
| 36 | 173Yb | CD86   | Fun-1   | RD          | MAB141-100 | 100 | Surface       |
| 37 | 174Yb | VISTA  | #730804 | RD          | 730804     | 50  | Surface       |
| 38 | 175Lu | CX3CR1 | K0124E1 | BioLegend   | 355702     | 200 | Surface       |
| 39 | 176Yb | HLA-DR | L243    | BioLegend   | 307612     | 100 | Surface       |
| 40 | 197Au | CD4    | RPA-T4  | BioLegend   | 300516     | 400 | Surface       |
| 41 | 198Pt | CD8a   | RPA-T8  | BioLegend   | 301018     | 400 | Surface       |
| 42 | 209Bi | CD11b  | M1/70   | BioLegend   | 101202     | 800 | Surface       |

**Table S2.** Summarize of the different abundant clusters from RPL as compared to control (NC-NK) .

| NC-NK                                                                               |     |      |      |     |         |      |          |          |        |      |      |     |      |      |       |       |
|-------------------------------------------------------------------------------------|-----|------|------|-----|---------|------|----------|----------|--------|------|------|-----|------|------|-------|-------|
| Differences occurred regardless of embryonic chromosomal aberrations                |     |      |      |     |         |      |          |          |        |      |      |     |      |      |       |       |
|                                                                                     | LC2 | LC14 | LC33 | TC3 | TC12    | TC20 | CD4+TC12 | CD4+TC15 | TregC3 | BC11 | BC13 | MC3 | MC12 | MC19 | NKC15 | NKC26 |
| RPL-NK                                                                              | ↓   | ↑    | ↓    | ↓   | ↑       | ↓    | ↑        | ↓        | ↑      | ↓    | ↑    | ↓   | ↑    | ↓    | ↓     | ↓     |
| RPL-AK                                                                              | ↓   | ↑    | ↓    | ↓   | ↑       | ↓    | ↑        | ↓        | ↑      | ↓    | ↑    | ↓   | ↑    | ↓    | ↓     | ↓     |
| Differences occurred only in RPL patients without embryonic chromosomal aberrations |     |      |      |     |         |      |          |          |        |      |      |     |      |      |       |       |
|                                                                                     | LC5 | LC12 | TC5  |     |         |      |          |          |        |      |      |     |      |      | NKC8  | NKC19 |
| RPL-NK                                                                              | ↑   | ↑    | ↑    |     |         |      |          |          |        |      |      |     |      |      | ↑     | ↑     |
| Differences occurred only in RPL patients with embryonic chromosomal aberrations    |     |      |      |     |         |      |          |          |        |      |      |     |      |      |       |       |
|                                                                                     |     |      |      | TC1 | CD4+TC6 |      |          |          | BC4    |      |      |     |      |      |       |       |
| RPL-AK                                                                              |     |      |      | ↑   | ↑       |      |          |          | ↓      |      |      |     |      |      |       |       |

**Table S3.** Summarize of the different abundant clusters from RPL-T16 and T21 as compared to RPL with embryo T22.

[illegible]

# Supplemental Figures and Legends

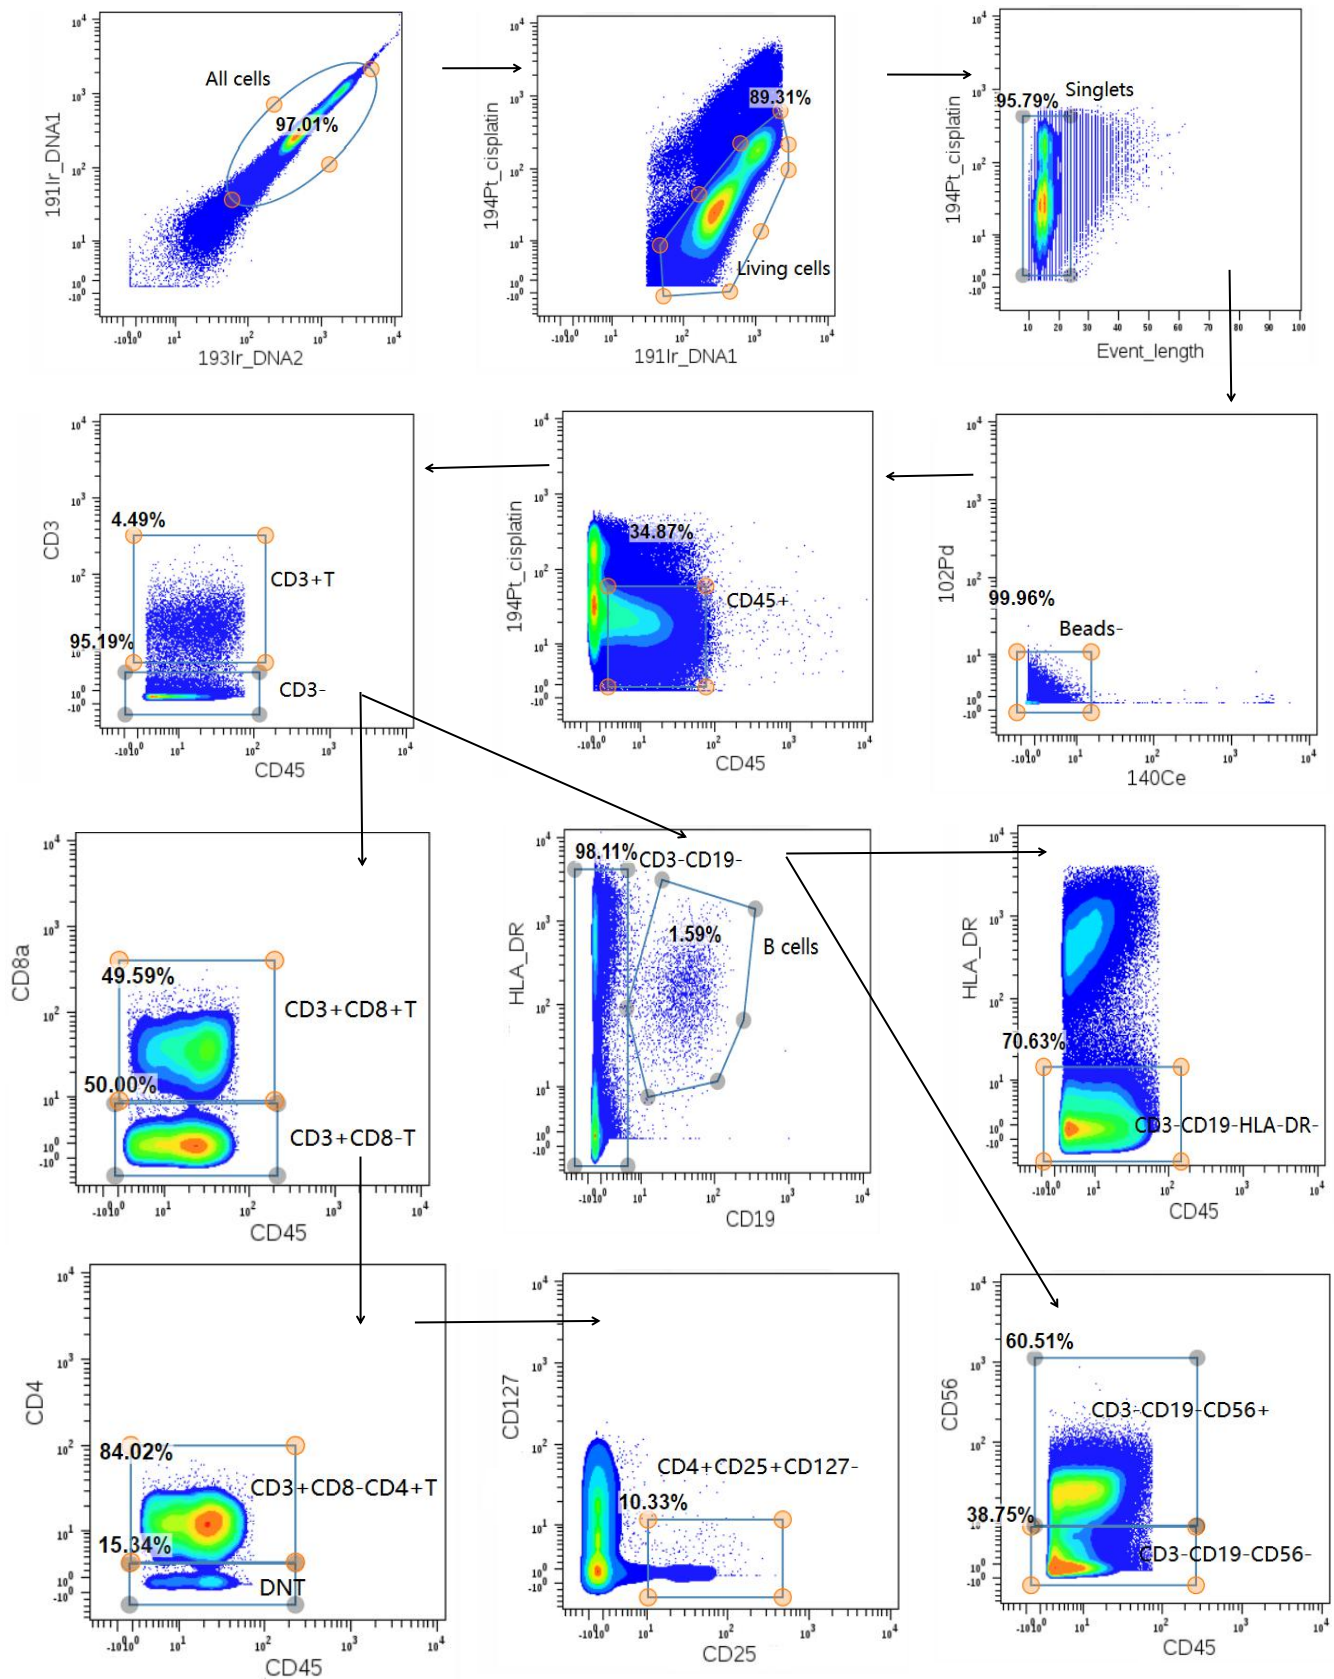

**Figure S1.** Gating strategy for Live CD45<sup>+</sup> leucocytes and different populations analyzed in present study. Iridium DNA double positive events were gated as all cells. Cisplatin DNA intercalator negative cells were gated as live cells and further for singlets by event-length, normalisation beads were then removed, at last they were separated by the expression of CD45. CD45<sup>+</sup> populations were further gated by CD3 expression. CD45<sup>+</sup>CD3<sup>+</sup> could be identified as T cells and further used to gate CD8<sup>+</sup>T by CD8a expression, CD4<sup>+</sup>T cells were gated from CD3<sup>+</sup>CD8<sup>-</sup>T cells by CD4 expression and Treg cells were lastly gated from CD4<sup>+</sup>T cell by CD25 and CD127 expression. CD45<sup>+</sup>CD3<sup>-</sup> cells were firstly used to gate B cells by CD19 and HLA-DR expression while the CD3<sup>-</sup>CD19<sup>-</sup> cells were used to gate CD3<sup>-</sup>CD19<sup>-</sup>HLA-DR<sup>-</sup> population by HLA-DR expression for analyzing ILCs and CD3<sup>-</sup>CD19<sup>-</sup>CD56<sup>-</sup> population by CD56 expression for analyzing myeloid macrophages and DCs.
